# Supplementary material for: Roles of pH and phosphate in rare earth element biosorption with living acidophilic microalgae
Source: Springer Nature journal article supplement (doi:10.1007/s00253-024-13068-8), 2024-03-14
Supplement: MOESM1 [file 253_2024_13068_MOESM1_ESM.pdf]

Supplementary Information to:

**Roles of pH and Phosphate in Rare Earth Element Biosorption with Living Acidophilic Microalgae**

Jens Kastenhofer<sup>1</sup>, Oliver Spadiut<sup>2</sup>, Vladimiro G. Papangelakis<sup>1</sup>, D. Grant Allen<sup>1\*</sup>

<sup>1</sup> University of Toronto, Department of Chemical Engineering and Applied Chemistry, 200 College Street, Toronto, ON M5S 3E5, Canada

<sup>2</sup> TU Wien, Institute of Chemical, Environmental and Bioscience Engineering, Research Division Biochemical Engineering, Research Group Integrated Bioprocess Development, Gumpendorfer Straße 1a, 1060 Vienna, Austria

\* Corresponding author: D. Grant Allen, [dgrant.allen@utoronto.ca](mailto:dgrant.allen@utoronto.ca)

## Supplementary Text 1

To synthesize solid  $\text{LaPO}_4$ , solutions of 1 M  $\text{LaCl}_3$  and 1 M  $\text{NaH}_2\text{PO}_4$  were prepared and 2.5 mL each were transferred to a 15 mL polypropylene tube. White precipitate formed immediately and the generated suspension was mixed on a vortexer for 5 minutes. The precipitated  $\text{LaPO}_4$  was then aged for 24 hours at  $25^\circ\text{C}$ . Subsequently, the suspension was centrifuged for 5 min at  $10000 \times g$  and  $21^\circ\text{C}$  and the solids were washed twice with ultrapure water. Solid  $\text{LaPO}_4$  was then resuspended in ultrapure water, transferred to a glass petri dish, and dried in an oven at  $95^\circ\text{C}$ .

**Table S1** Composition of modified Bold's Basal Medium

|                                                                | Stock<br>concentration<br>[g/L] | Added per<br>1 L medium<br>[mL] |                                                       | Stock<br>concentration<br>[g/L] | Added per<br>1 L medium<br>[mL] |
|----------------------------------------------------------------|---------------------------------|---------------------------------|-------------------------------------------------------|---------------------------------|---------------------------------|
| $\text{NaNO}_3$                                                | 250                             | 1                               | Trace compound<br>stock containing:                   |                                 | 1                               |
| $\text{KH}_2\text{PO}_4$                                       | 175                             | 1                               | $\text{H}_3\text{BO}_3$                               | 2.86                            |                                 |
| $\text{K}_2\text{HPO}_4$                                       | 75                              | 1                               | $\text{ZnSO}_4 \cdot 7 \text{H}_2\text{O}$            | 0.22                            |                                 |
| $\text{MgSO}_4 \cdot 7 \text{H}_2\text{O}$                     | 75                              | 1                               | $\text{Na}_2\text{MoO}_4 \cdot 2 \text{H}_2\text{O}$  | 0.39                            |                                 |
| $\text{CaCl}_2 \cdot 2 \text{H}_2\text{O}$                     | 25                              | 1                               | $\text{CuSO}_4 \cdot 5 \text{H}_2\text{O}$            | 0.08                            |                                 |
| $\text{NaCl}$                                                  | 25                              | 1                               | $\text{Co}(\text{NO}_3)_2 \cdot 6 \text{H}_2\text{O}$ | 0.05                            |                                 |
| $\text{Na}_2\text{EDTA} \cdot 2 \text{H}_2\text{O}$<br>(+ KOH) | 10 (6.2)                        | 1                               |                                                       |                                 |                                 |
| $\text{FeSO}_4 \cdot 7 \text{H}_2\text{O}$                     | 4.98                            | 1                               |                                                       |                                 |                                 |
| $\text{H}_3\text{BO}_3$                                        | 11.5                            | 0.7                             |                                                       |                                 |                                 |

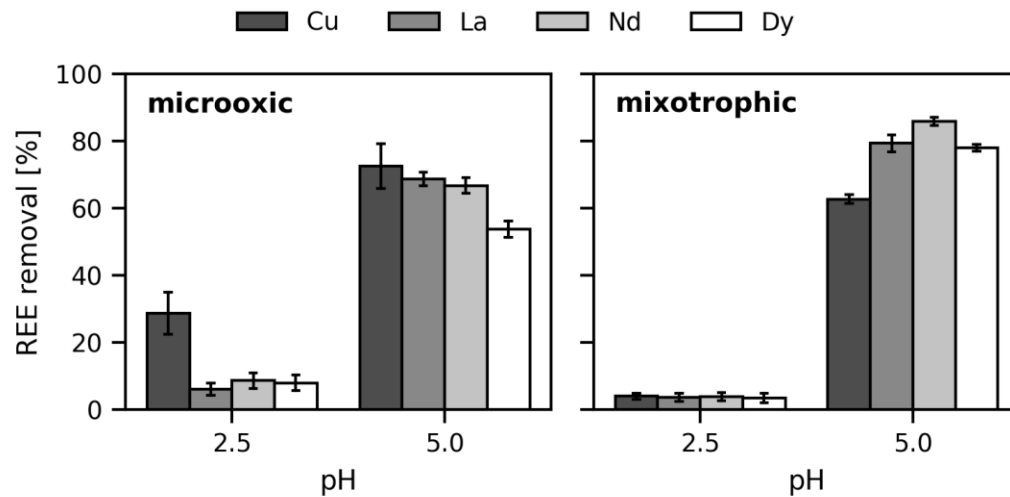

**Fig. S1** Efficiency of REE removal with *G. sulphuraria* from an acidic sulfate system containing 5 ppm each of Cu (79  $\mu$ M), La (36  $\mu$ M), Nd (35  $\mu$ M), and Dy (31  $\mu$ M).

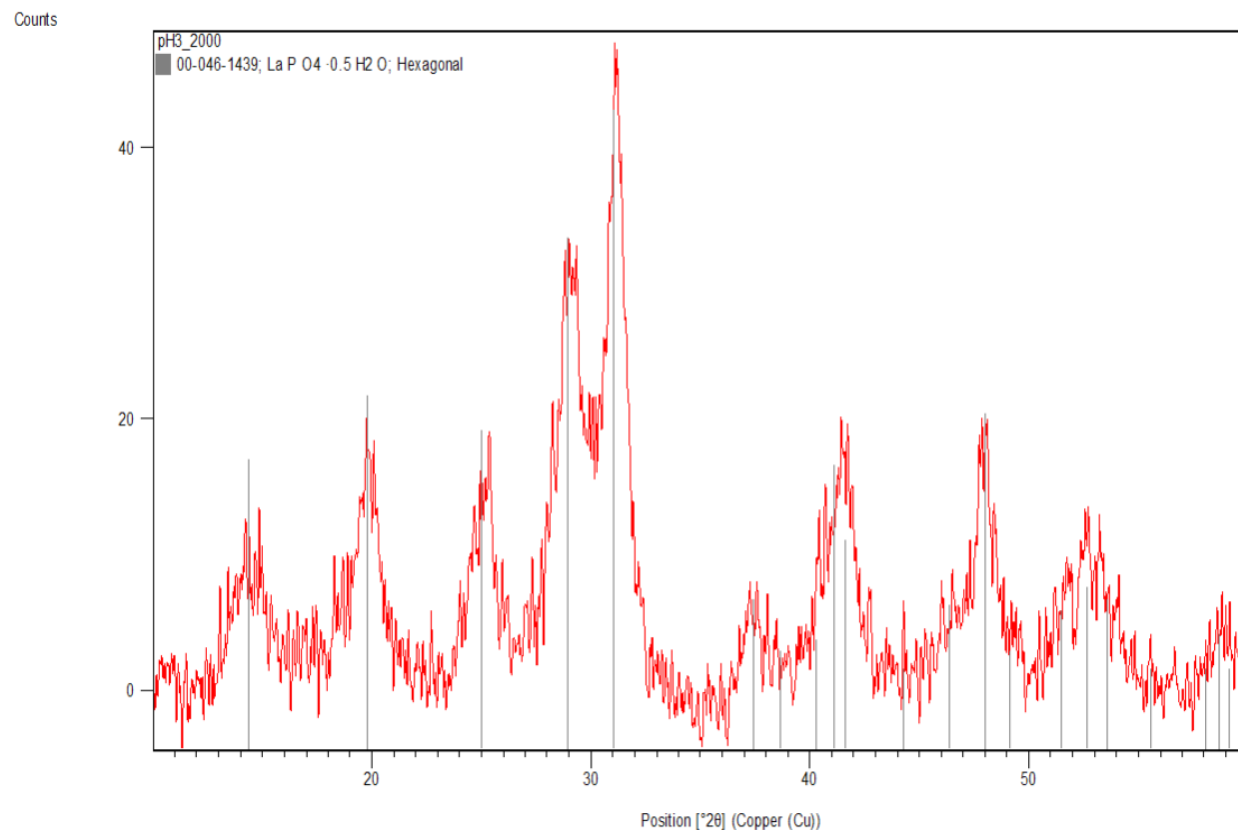

**Fig. S2** XRD pattern of the precipitate formed in *Galdieria* medium at initial pH = 3, 72 h after spiking the solution with 2000  $\mu$ M  $\text{LaCl}_3$ . The grey lines are the reference pattern for crystalline  $\text{LaPO}_4 \cdot 0.5 \text{H}_2\text{O}$ . The XRD pattern of the sample displays poorly defined peaks, indicating weak crystallinity.

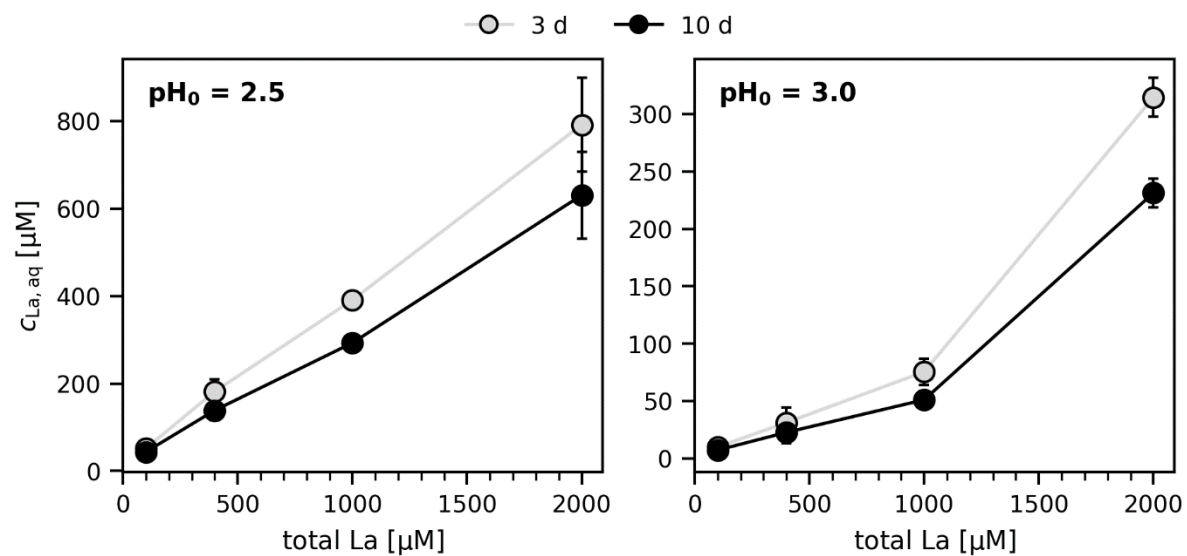

**Fig. S3** Dissolved La concentrations in *Galdieria* medium at two initial pH values, 3 and 10 days after adding  $LaCl_3$ .
